# Supplementary material
Source: PubMed Central journal article supplement (PMC5505514)

FIGURE 1C

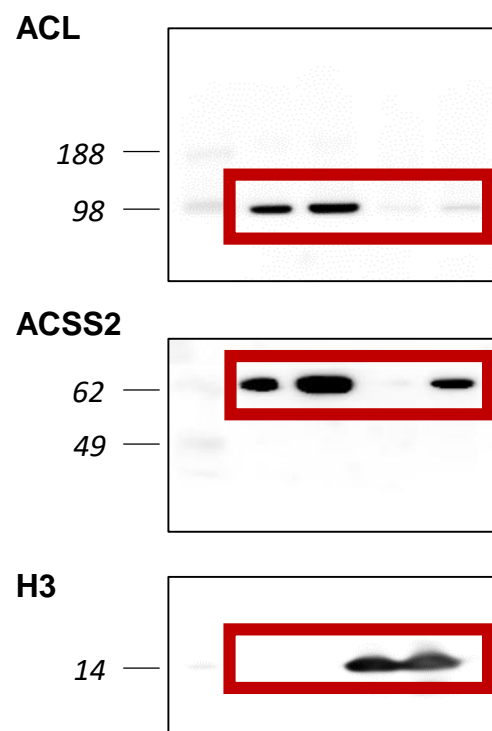

FIGURE 1E & EXTENDED DATA FIG. 1G

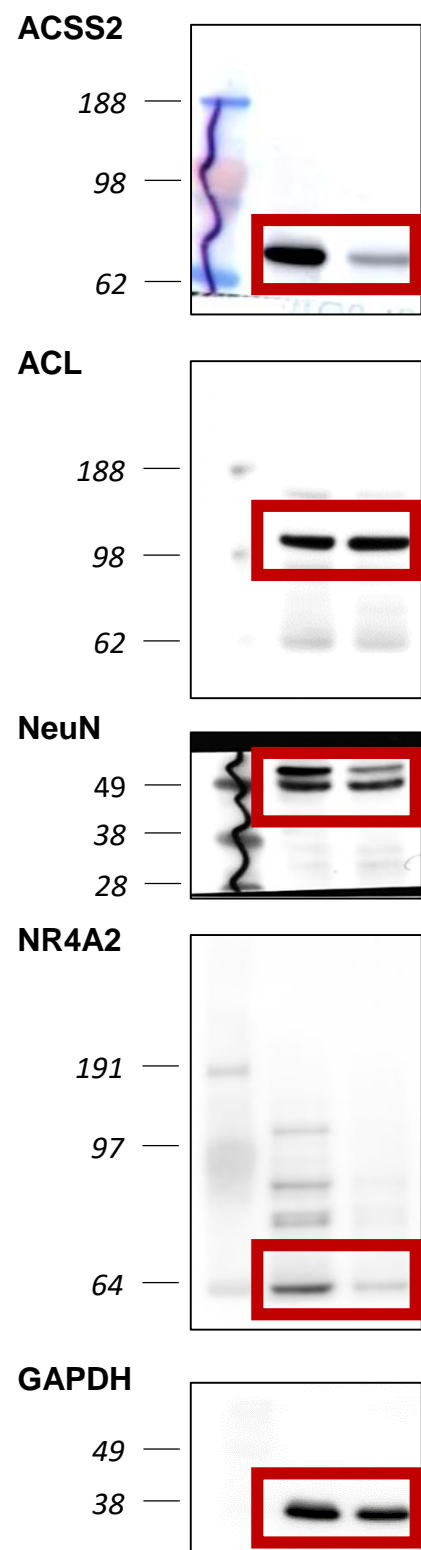

FIGURE 2G

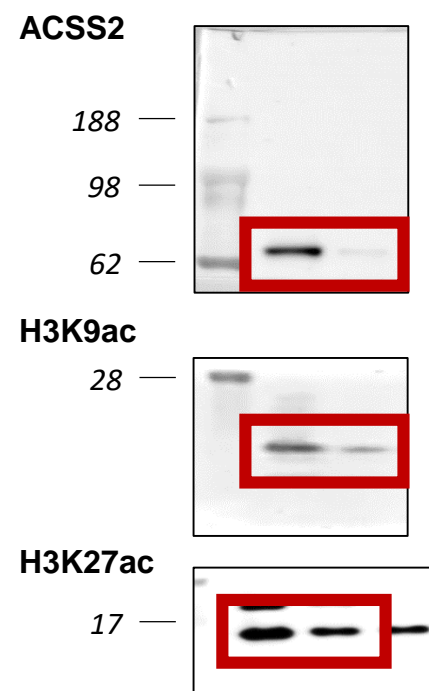

FIGURE 2H

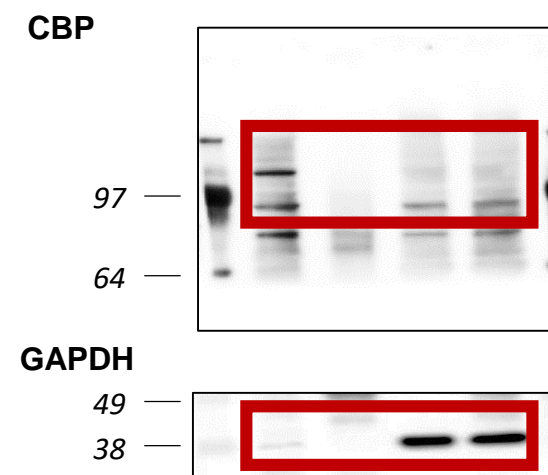

FIGURE 4B

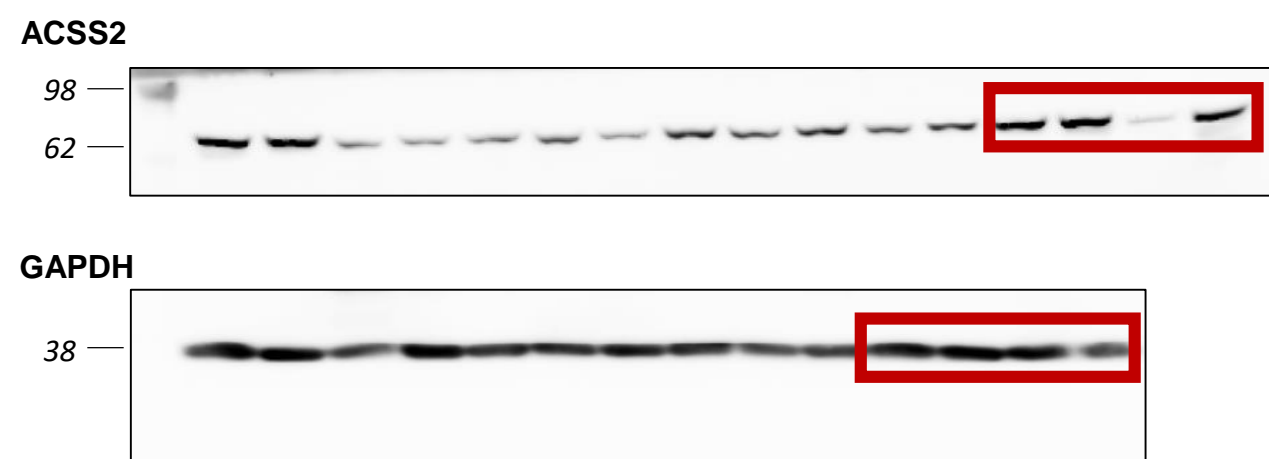

FIGURE 2J

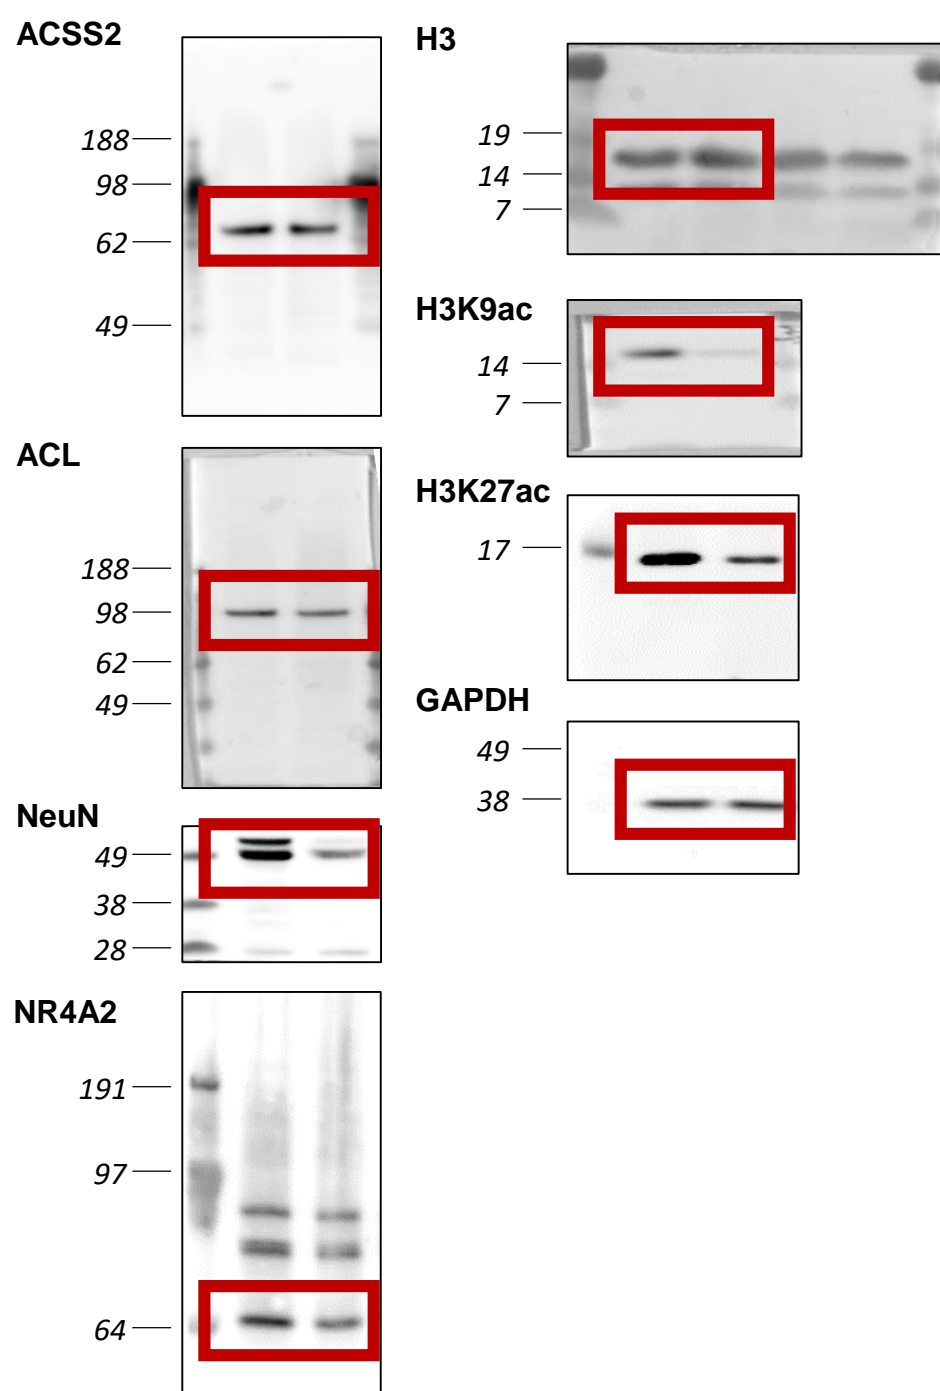

EXTENDED DATA FIGURE 1B

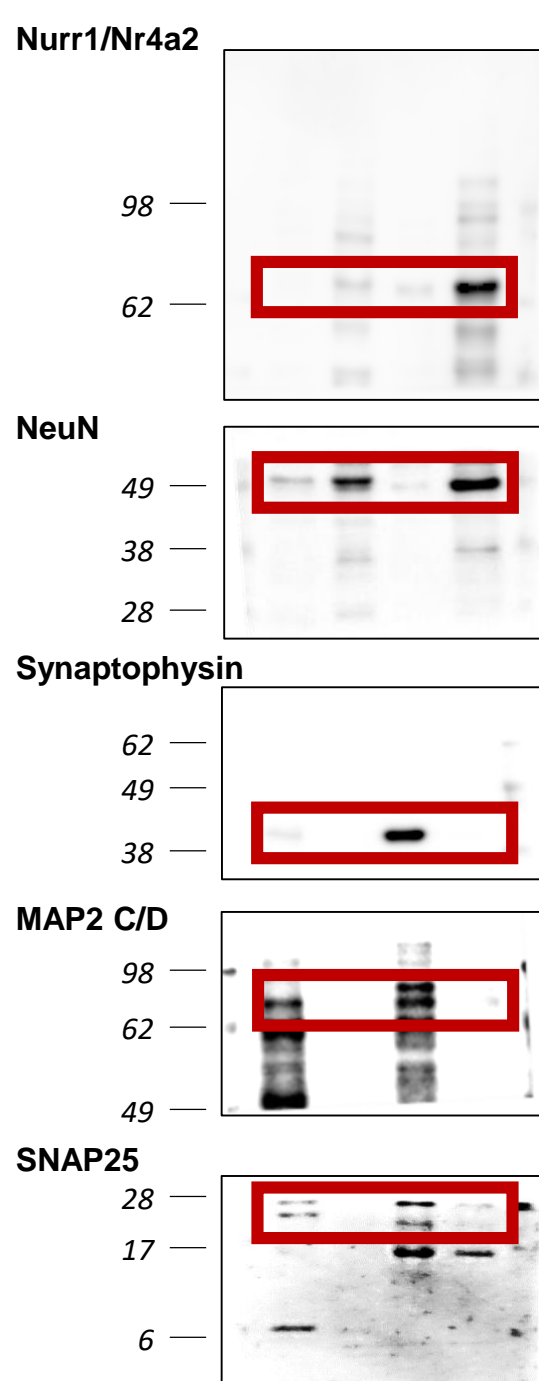

EXTENDED DATA FIGURE 6B

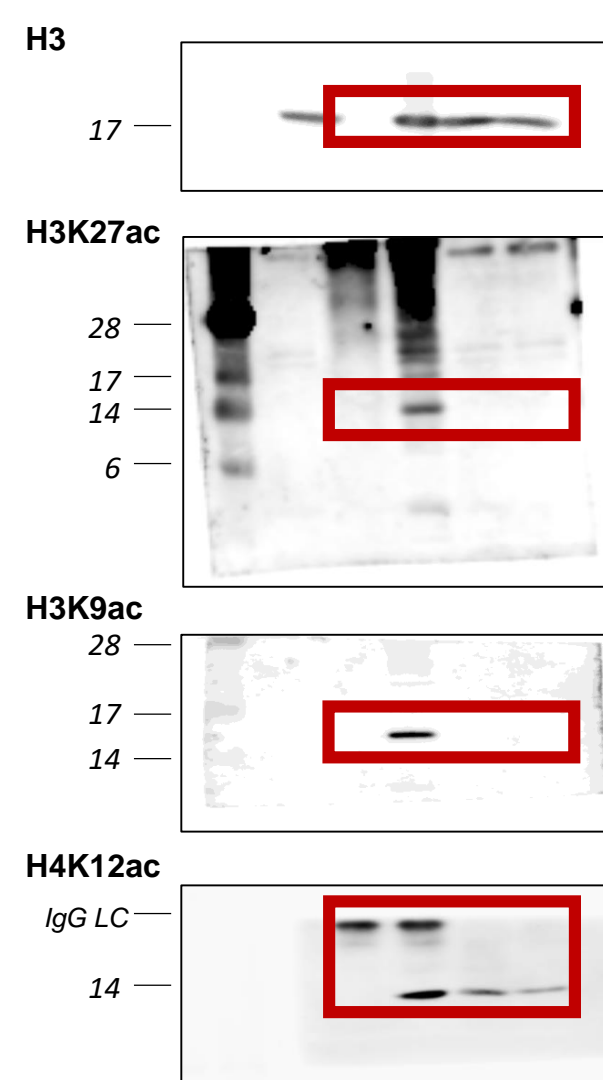

**FIGURE 3C**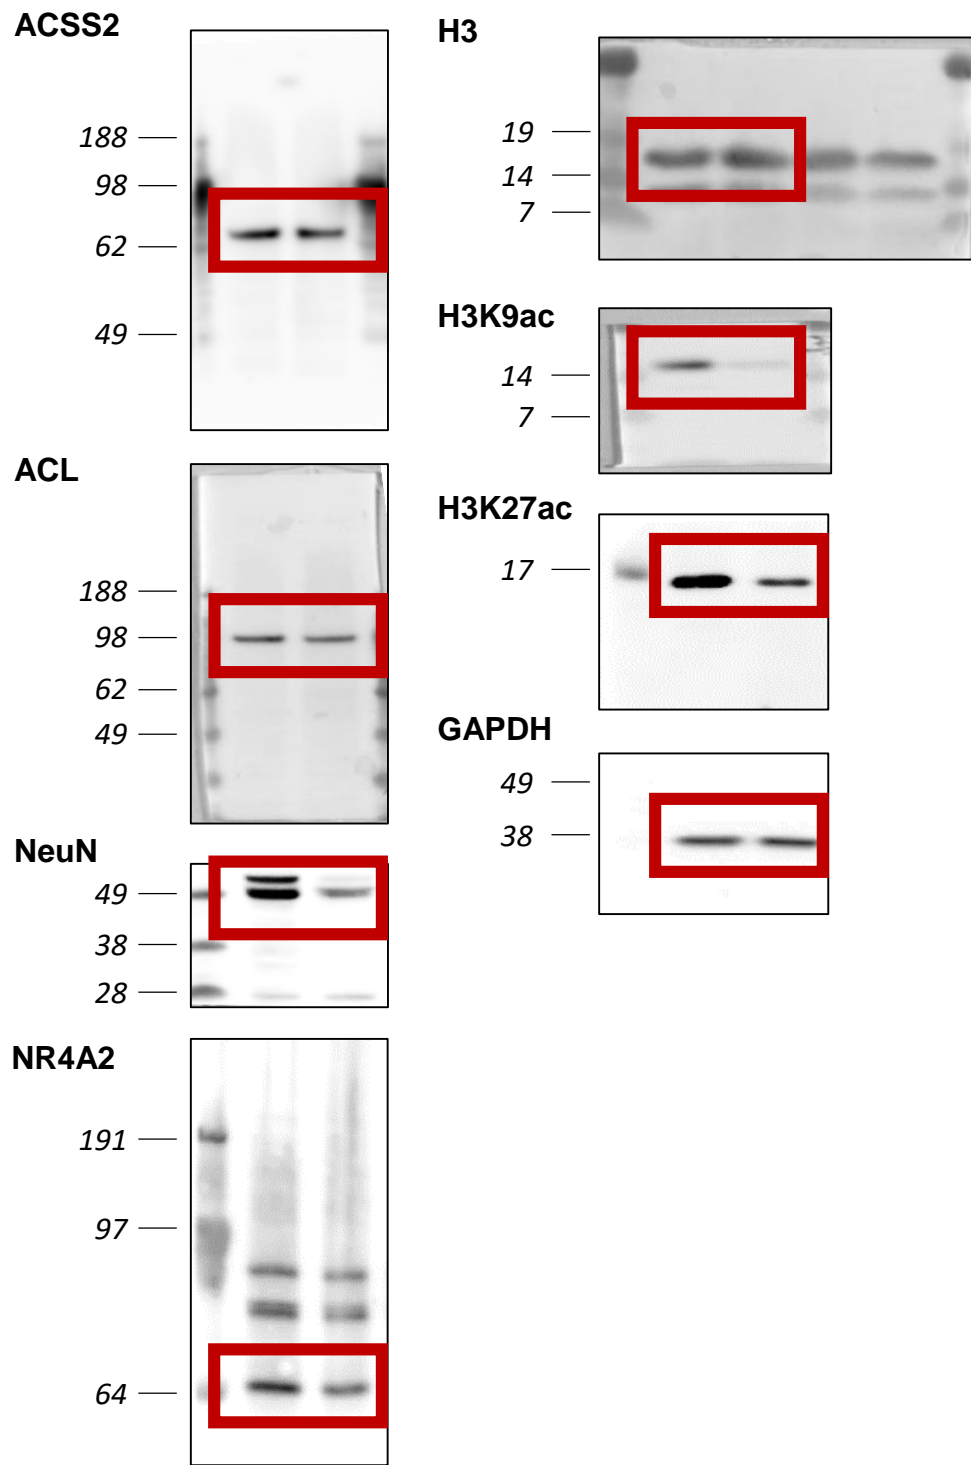**FIGURE S1B**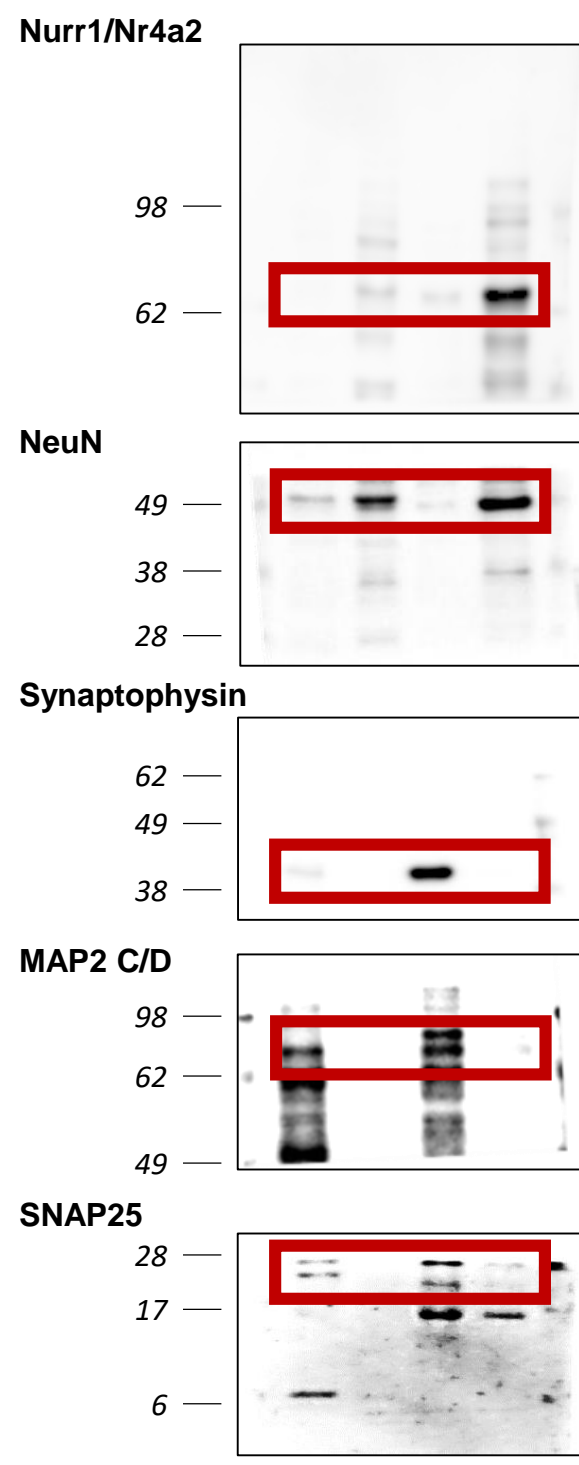**FIGURE S8B**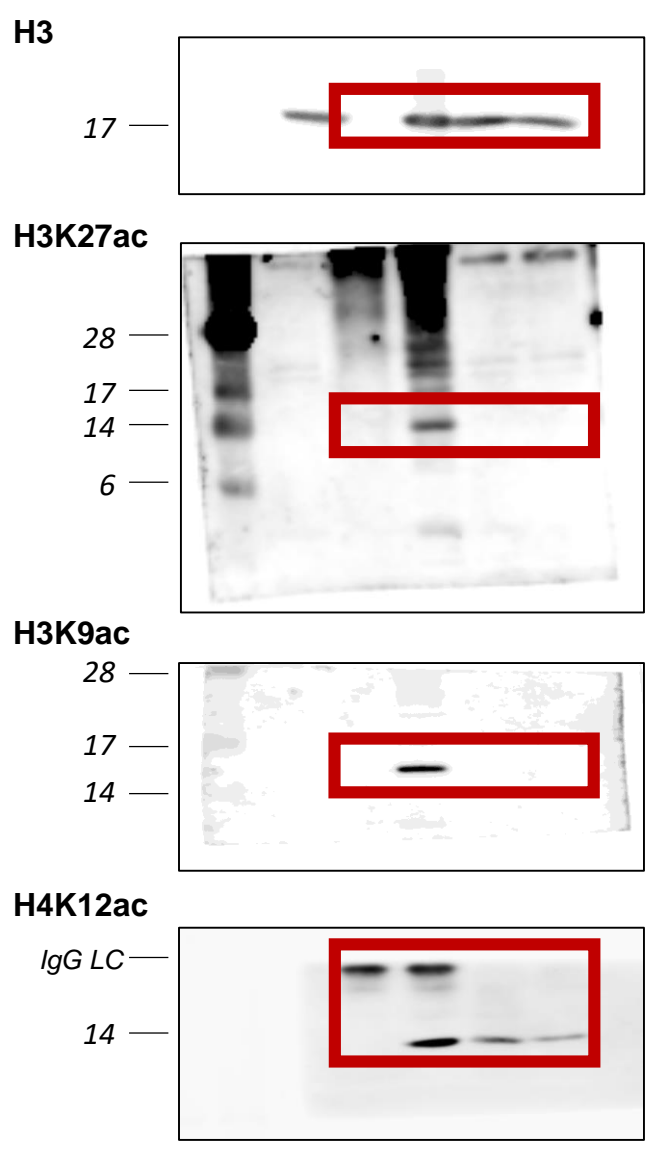**FIGURE S1B**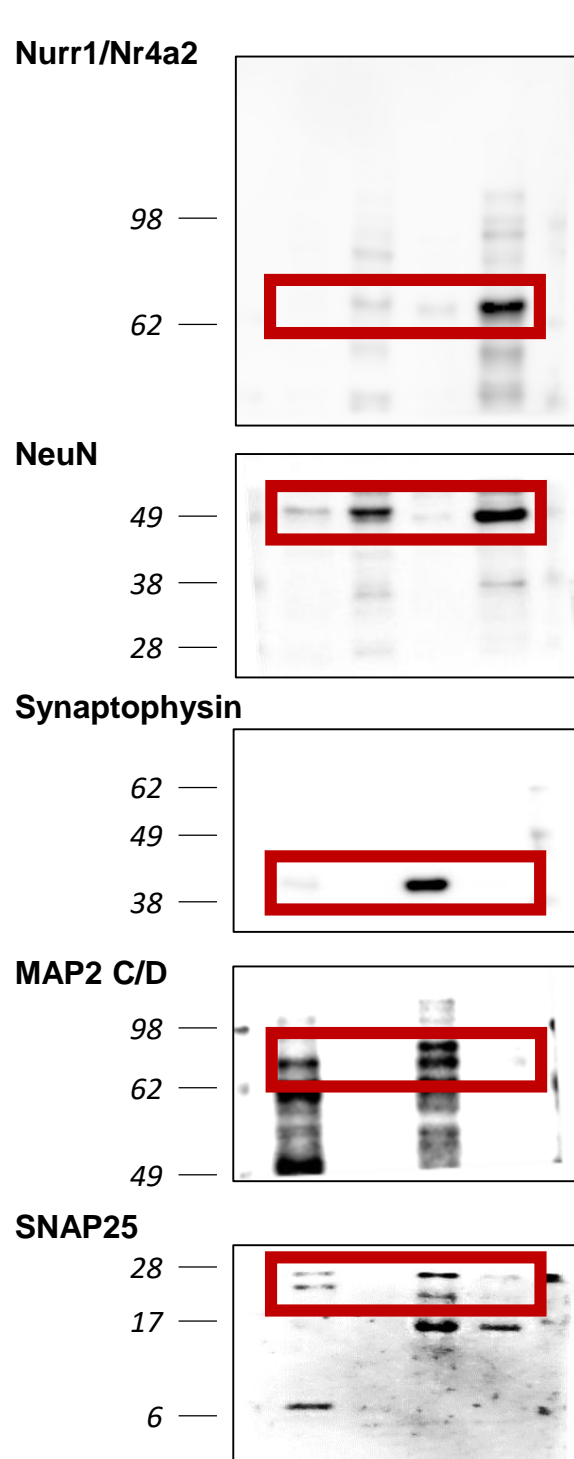**FIGURE S8B**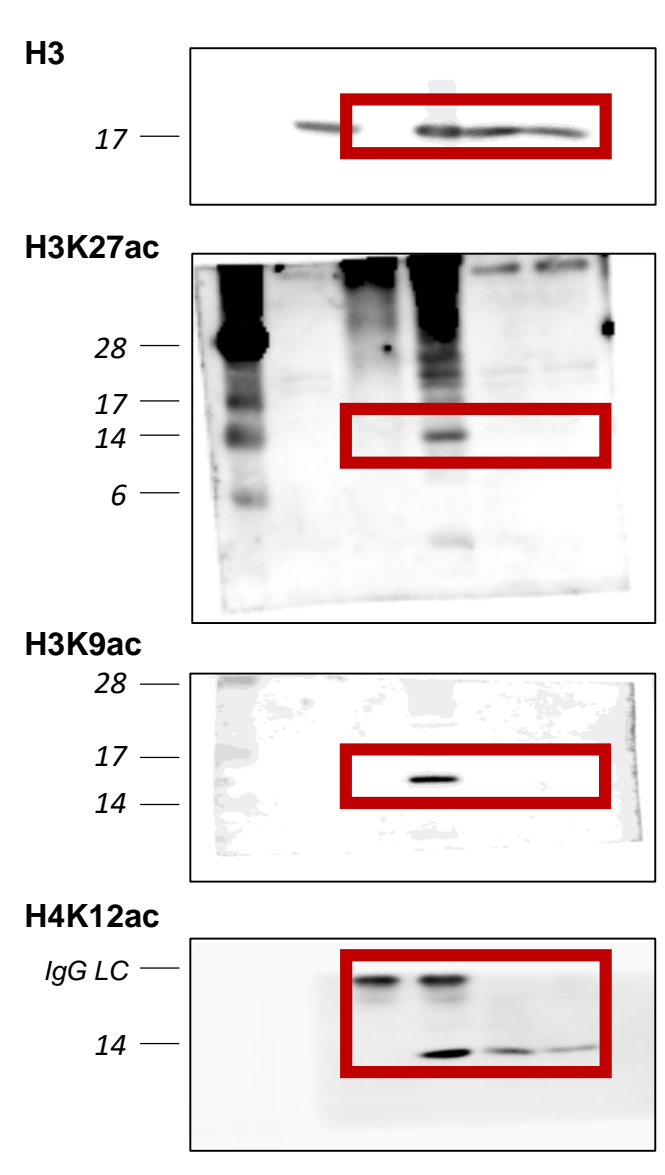

Supplement: NIHMS872465-supplement-1.pdf [file NIHMS872465-supplement-1.pdf]
